# Supplementary material
Source: HighWire-hosted journal article supplement (https://erj.ersjournals.com/content/58/4/2102168)
Supplement: inline-supplementary-material-1 [file inline-supplementary-material-1.pdf]

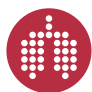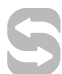

SHAREABLE PDF

# 3TR: a pan-European cross-disease research consortium aimed at improving personalised biological treatment of asthma and COPD

Celeste Porsbjerg<sup>1,2</sup>, Anke H. Maitland-van der Zee<sup>3,4</sup>, Guy Brusselle<sup>5</sup>, Giorgio Walter Canonica<sup>6,7</sup>, Alvar Agusti<sup>8,9</sup>, Rosa Faner<sup>8</sup>, Claus F. Vogelmeier<sup>10,11</sup>, Martijn Nawijn<sup>12</sup>, Maarten van den Berge<sup>13</sup>, Franca Rusconi<sup>14</sup>, Charles Pilette<sup>15</sup>, Valeria Ramiconi<sup>16</sup>, Courtney Coleman<sup>17</sup>, Rekha Chaudhuri<sup>18</sup>, Kian Fan Chung<sup>19</sup>, Jadwiga Wedzicha<sup>19</sup>, Sejla Saglani<sup>19,20</sup>, Marc P. Van der Schee<sup>21</sup>, Liam Heaney<sup>22</sup>, Arnaud Bourdin<sup>23,24</sup>, Graham Roberts<sup>25,26,27</sup>, Ratko Djukanovic<sup>28</sup>, Piotr Kuna<sup>29</sup>, Macej Kupczyk<sup>29</sup>, Judith Axmann<sup>30</sup>, Heribert Staudinger<sup>31</sup>, Graham W. Clarke<sup>32</sup>, Sven Erik Dahlen<sup>33,34</sup> and Chris Brightling<sup>35</sup>

<sup>1</sup>Dept of Respiratory Medicine, Bispebjerg University Hospital, Copenhagen, Denmark. <sup>2</sup>Copenhagen Center for Translational Research, Bispebjerg Hospital, Copenhagen, Denmark. <sup>3</sup>Dept of Respiratory Medicine, Amsterdam UMC, University of Amsterdam, Amsterdam, The Netherlands. <sup>4</sup>Dept of Pediatric Pulmonology, Amsterdam UMC, University of Amsterdam, Amsterdam, The Netherlands. <sup>5</sup>Dept of Respiratory Medicine, Ghent University Hospital, Ghent, Belgium. <sup>6</sup>Personalized Medicine, Asthma and Allergy Humanitas Clinical and Research Center IRCCS, Rozzano, Italy. <sup>7</sup>Dept of Biomedical Sciences, Humanitas University, Pieve Emanuele, Italy. <sup>8</sup>Hospital Clinic, University of Barcelona, Barcelona, Spain. <sup>9</sup>IDIBAPS, CIBERES, Barcelona, Spain. <sup>10</sup>Dept of Medicine, Pulmonary and Critical Care Medicine, University of Marburg (UMR), Marburg, Germany. <sup>11</sup>Member of the German Center for Lung Research (DZL), Marburg, Germany. <sup>12</sup>Dept of Pathology and Medical Biology, University of Groningen, University Medical Center Groningen, GRIAC Research Institute, Groningen, The Netherlands. <sup>13</sup>Dept of Pulmonary Diseases, University of Groningen, University Medical Center Groningen, Groningen, The Netherlands. <sup>14</sup>Unit of Epidemiology, Meyer Children's University Hospital, Florence, Italy. <sup>15</sup>Dept of pneumology, Cliniques universitaires Saint-Luc and Institute of Experimental and Clinical Research, Université catholique de Louvain, Brussels, Belgium. <sup>16</sup>European Federation of Allergy and Airways Diseases Patients' Associations (EFA), Brussels, Belgium. <sup>17</sup>European Lung Foundation, Sheffield, UK. <sup>18</sup>Division of Infection, Immunity and Inflammation, University of Glasgow, Glasgow, UK. <sup>19</sup>National Heart and Lung Institute, Imperial College London, London, UK. <sup>20</sup>Dept of Paediatric Respiratory Medicine, Royal Brompton Hospital, London, UK. <sup>21</sup>Owlstone Medical Ltd, Cambridge, UK. <sup>22</sup>Wellcome-Wolfson Centre for Experimental Medicine, School of Medicine, Dentistry and Biomedical Sciences, Queen's University, Belfast, UK. <sup>23</sup>Dept of Respiratory Diseases, Univ Montpellier, CHU Montpellier, Montpellier, France. <sup>24</sup>PhyMedExp, Univ Montpellier, CNRS, INSERM, Montpellier, France. <sup>25</sup>Faculty of Medicine, University of Southampton, Southampton, UK. <sup>26</sup>NIHR Southampton Biomedical Research Centre, University Hospital Southampton NHS Foundation Trust, Southampton, UK. <sup>27</sup>The David Hide Asthma and Allergy Research Centre, St Mary's Hospital, Isle of Wight, UK. <sup>28</sup>Clinical and Experimental Science, Faculty of Medicine and NIHR Southampton Biomedical Research centre, Southampton, UK. <sup>29</sup>Dept of Internal Medicine, Asthma and Allergy, Medical University of Lodz, Lodz, Poland. <sup>30</sup>Immunology, Infectious Diseases and Ophthalmology Discovery and Translational Area, Roche Pharma Research & Early Development, F. Hoffmann-La Roche Ltd, Basel, Switzerland. <sup>31</sup>Clinical Strategy Lead, Immunology and Inflammation Therapeutic Area, Sanofi Genzyme, Bridgewater, NJ, USA. <sup>32</sup>Translational Science and Experimental Medicine, Research and Early Development, Respiratory & Immunology, BioPharmaceuticals R&D, AstraZeneca, Gothenburg, Sweden. <sup>33</sup>The Center for Allergy Research and the Institute of Environmental Medicine, Karolinska Institutet, Stockholm, Sweden. <sup>34</sup>Dept of Respiratory Medicine, Karolinska University Hospital Huddinge, Stockholm, Sweden. <sup>35</sup>Dept of Respiratory Sciences, University of Leicester, Leicester, UK.

Corresponding author: Celeste Porsbjerg (celeste.porsbjerg@regionh.dk)

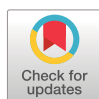

Shareable abstract (@ERSpublications)

**3TR, the largest IMI consortium ever in immune diseases, brings clinical researchers and scientists from several disease areas together, in an endeavour to increase the clinical impact of targeted immune-mediated therapies, including asthma and COPD** <https://bit.ly/3kPq0xI>

**Cite this article as:** Porsbjerg C, Maitland-van der Zee AH, Brusselle G, *et al.* 3TR: a pan-European cross-disease research consortium aimed at improving personalised biological treatment of asthma and COPD. *Eur Respir J* 2021; 58: 2102168 [DOI: 10.1183/13993003.02168-2021].

This single-page version can be shared freely online.

permissions contact  
permissions@ersnet.org

Received: 4 Aug 2021  
Accepted: 20 Aug 2021

gastroenterology, together, to study disease mechanisms across seven disease entities: asthma, COPD, systemic lupus erythematosus, rheumatoid arthritis, multiple sclerosis, ulcerative colitis and Crohn's disease.
